1 **Kinetics characterization of ASXL1/2-mediated allosteric regulation of BAP1 deubiquitinase**

2  
3 Hongzhuang Peng<sup>1</sup>, Joel Cassel<sup>1</sup>, Daniel S. McCracken<sup>1,2</sup>, Jeremy W. Prokop<sup>3,4</sup>, Paul R. Collop<sup>5</sup>,  
4 Alexander Polo<sup>1</sup>, Surbhi Joshi<sup>1</sup>, Jacob P. Mandell<sup>1</sup>, Kasirajan Ayyanathan<sup>1</sup>, David Hinds<sup>3,4</sup>,

5 S. Bruce Malkowicz<sup>6</sup>, J. William Harbour<sup>7</sup>, Anne M. Bowcock<sup>8</sup>, Joseph Salvino<sup>1</sup>, Eileen J. Kennedy<sup>5</sup>, Joseph  
6 R. Testa<sup>9\*</sup>, Frank J. Rauscher III<sup>1</sup>

7  
8 <sup>1</sup>The Wistar Institute, Philadelphia, PA 19104; <sup>2</sup>Department of Biochemistry and Molecular Biophysics,  
9 University of Pennsylvania, Philadelphia, PA 19104; <sup>3</sup>Department of Pediatrics and Human Development,  
10 College of Human Medicine, Michigan State University, Grand Rapids MI 49503; <sup>4</sup>Department of  
11 Pharmacology and Toxicology, Michigan State University, East Lansing MI 48824; <sup>5</sup>Department of  
12 Pharmaceutical and Biomedical Sciences, College of Pharmacy, University of Georgia, Athens, GA  
13 30602; <sup>6</sup>Division of Urology, Department of Surgery, University of Pennsylvania, Philadelphia, PA  
14 19104; <sup>7</sup>University of Miami School of Medicine, Miami, FL 33101; <sup>8</sup>Icahn School of Medicine at Mount  
15 Sinai, New York, NY 10029; <sup>9</sup> Fox Chase Cancer Center, Philadelphia, PA 19111

16 **Short Title:** *ASXL-mediated allosteric regulation of BAP1 deubiquitinase*

17 **Keywords:** Deubiquitination, allosteric regulation, cancer biology, protein-protein interaction, structural  
18 model.

19 **Contact information, Corresponding author:** Joseph R. Testa, Fox Chase Cancer Center, Philadelphia,  
20 PA 19111, Phone: (215)728-2610, Email: [joseph.testa@fccc.edu](mailto:joseph.testa@fccc.edu)

21 **Author Contributions:** Conceptualization was done by HP, DSM, JWP, FJR. Data curation was done  
22 by HP, JC, DSM, JWP. Formal Analysis was done by HP, JC, DSM, JWP, EJK. Funding Acquisition  
23 was done by JWP, SBM, EJK, JRT, FJR. Investigation was done by HP, JC, DSM, JWP, PRC, AP, SJ,  
24 JPM, KA, DH. Methodology was done by HP, JC, DSM, JWP, DH. Project Administration was done by  
25 HP, SBM, JWH, ANB, JS, EJK, JRT, FJR. Resources were done by HP, DSM, AP, SJ, JPM, JWM,  
26 AMB. Software was done by JC, JWP, DH, JS. Supervision was done by HP, DSM, JWP. Validation

27 was done by HP, DSM, JWP, EJK. Visualization was done by HP, JC, DSM, JWP, EJK. Writing –  
28 Original Draft Preparation was done by HP, JC, DSM, JWP, EJK, JRT. Writing – Review and Editing  
29 were done by all authors.

30

31 **Abstract**

32 BAP1 is a ubiquitin hydrolase whose deubiquitinase activity is mediated by polycomb group-like  
33 protein ASXL2. Cancer-related mutations/deletions of *BAP1* lead to loss-of-function either by directly  
34 targeting the catalytic (UCH) or ULD domains of BAP1, the latter disrupts binding to ASXL2, an  
35 obligate partner for BAP1 enzymatic activity. However, the biochemical and biophysical properties of the  
36 domains involved in forming the enzymatically active complex are unknown. Here we investigate the  
37 molecular dynamics, kinetics and stoichiometry of these interactions. We demonstrate that the BAP1 and  
38 ASXL2 domain/proteins or protein complexes produced in either bacteria or baculovirus are structurally  
39 and functionally active. The interaction between BAP1 and ASXL2 is direct, specific, and stable to *in*  
40 *vitro* biochemical and biophysical manipulations as detected by isothermal titration calorimetry, GST  
41 association, and optical biosensor assays. Association of the ASXL2-AB box greatly stimulates BAP1  
42 deubiquitinase activity. A stable ternary complex can be formed comprised of the BAP1-UCH, BAP1-  
43 ULD, and ASXL2-AB domains. Binding of the BAP1-ULD domain to the ASXL2-AB box is rapid, with  
44 fast association and slow dissociation rates. Stoichiometric analysis revealed that one molecule of the  
45 ULD domain directly interacts with one molecule of the AB Box. Real-time kinetics analysis of ULD/AB  
46 protein complex to the UCH domain of BAP1, based on SPR, indicated that formation of the ULD/AB  
47 complex with the UCH domain is a single-step event with fast association and slow dissociation rates.  
48 These structural and dynamic parameters implicate the possibility for future small-molecule approaches to  
49 reactivate latent wild-type UCH activity in BAP-mutant malignancies.

50  
51 **The abbreviations used are:** UCH, ubiquitin C-terminal hydrolase; ULD, UCH37-like domain; PcG,  
52 polycomb group (PcG); polycomb repressive deubiquitinase (PR-DUB); ASXH, *Asx* homology domain;  
53 PHD, plant homeo domain; PRC2, polycomb repressive complex 2; NLS, nuclear localization signals;  
54 Bac, bacteria; Bv, baculovirus; SPR, surface plasmon resonance; ITC, isothermal titration calorimetry;  
55 CD, circular dichroism; DLS, dynamic light scattering.

56

## 57 **Introduction**

58 BAP1 was discovered as an ubiquitin hydrolase that associates with the RING finger domain of  
59 BRCA1 and enhances BRCA1-mediated inhibition of breast cancer cell growth (1). The N-terminus of  
60 BAP1 consists of a UCH domain (ubiquitin C-terminal hydrolase) that cleaves ubiquitin from ubiquitin-  
61 conjugated small substrates. BAP1 contains two protein-binding motifs for BARD1 and BRCA1, which  
62 form a tumor suppressor heterodimeric complex (2), and a binding site for HCF1, which interacts with a  
63 histone-modifying complex during cell division (3). The C-terminus of BAP1 contains two nuclear  
64 localization signals and ULD (UCH37-like domain). The ULD domain interacts with ASXL family  
65 members to form the polycomb group (PcG)-repressive deubiquitinase complex involved in stem cell  
66 pluripotency and other developmental processes (4, 5).

67 Homology of the BAP1-UCH and other UCH-like proteins implies a role for either ubiquitin-  
68 mediated, proteasome-dependent degradation or other ubiquitin-mediated regulatory pathways in BRCA1  
69 function, in cellular growth, differentiation, and homeostatic processes (1, 6, 7). BAP1 exhibits tumor  
70 suppressor activity in cancer cells (1, 2) and *in vivo* (8). Moreover, not only were somatic  
71 mutations/deletions of *BAP1* found in metastasizing uveal melanomas, malignant mesothelioma, and  
72 other cancers (9-11), but also germline mutations of *BAP1* were found in families with a high incidence of  
73 mesothelioma, uveal melanoma, benign and malignant cutaneous melanocytic tumors, basal cell  
74 carcinoma, meningioma, and renal carcinoma (11-15). Cancer-related mutations/deletions of *BAP1* often  
75 result in loss-of-function by causing premature protein termination, protein instability and/or loss of UCH  
76 catalytic activity. Other mutations of *BAP1* lead to loss-of-function by targeting the ULD domain, thereby  
77 disrupting binding to ASXL2 (16) an obligate partner for BAP1 enzymatic activity.

78 BAP1 functions as part of a large polycomb-like complex throughout vertebrate and invertebrate  
79 biology through the ASXL1/2 family members (5). The *Drosophila* PcG Calypso protein is homologous  
80 to BAP1. Calypso interacts with PcG protein *Asx*, and this Polycomb repressive deubiquitinase (PR-  
81 DUB) complex binds to PcG target genes. The human homologs of *Asx* are *ASXL1-3* (16). The N-  
82 terminus of ASXL contains the highly conserved *Asx* homology domain (ASXH), which is required for

83 Calypso/BAP1 protein binding. Similar to *Drosophila Asx*, human ASXL1/2-BAP1 complexes  
84 deubiquitinate histone H2A. Mutations of *ASXL1/2/3* genes leading to protein truncations have been  
85 found associated with human cancers and other diseases (17-20). One example is loss-of-function  
86 mutations in *ASXL1*, which encodes an epigenetic modifier that plays a role in polycomb repressive  
87 complex (PRC2)-mediated transcriptional repression in hematopoietic cells. Such loss-of-function  
88 mutations in myeloid malignancies result in loss of PRC2-mediated gene repression of leukemogenic  
89 target genes (17). The crystal structure of *Drosophila* PR-DUB, has revealed that the deubiquinase  
90 Calypso and its activating partner ASX form a 2:2 complex. This bidentate Calypso ASX complex is  
91 generated by dimerization of two activated Calypso proteins through their coiled-coil regions. Disrupting  
92 the Calypso dimer interface does not affect inherent catalytic activity, but inhibits removal of  
93 H2AK119Ub as a consequence of impaired recruitment to nucleosomes (21).

94 In a early previous study, we found that the familial and somatic *BAP1* mutations inactivate  
95 ASXL1/2-mediated allosteric regulation of BAP1 deubiquitinase by targeting multiple independent  
96 domains (16). The AB Box of ASXL2 mediates the binding of ULD and UCH domains of BAP1 to form  
97 a tripartite complex, which subsequently stabilizes the UCH structure, thereby increasing the catalytic  
98 activity of BAP1-UCH. The tumor-derived discrete in-frame deletions and insertions outside of the BAP1  
99 catalytic domain (UCH) disrupt the BAP1-ASXL2 interaction, leading to tumor-related loss of BAP1  
100 catalytic activity. In this study, we define the biochemical and biophysical properties of the domain-  
101 domain interactions of this complex. Importantly, these new studies elucidate the molecular dynamics of  
102 the interaction, measure the kinetic and stoichiometric impact of mutations on proteins binding and on the  
103 enzymatic activity of BAP1, and provide novel insights about the structural and dynamic parameters of  
104 the BAP1-ASXL2 interaction into single cell datasets that inform future small-molecule approaches to  
105 reactivate latent wild-type UCH activity in BAP-mutant malignancies.

106

107

108

109 **Materials and methods**

110 **Plasmids**

111 The pFastBacTHa-BAP1-FL-WT, -BAP1-UCH-WT and -UCH-C91S mutant plasmids, pGEX-  
112 2TK-BAP1-UCH-WT (1-250 aa), pGEX-4T-1-BAP1-ULD, pQE30-BAP1-ULD (601-729aa) and  
113 pQE30-ASXL2-AB (261-381aa) plasmids were previously described (16). The pETDuet-1-His-BAP1-  
114 ULD+ASXL2-AB plasmid was constructed through PCR-based cloning and was sequenced to confirm its  
115 authenticity.

116 **Proteins expression and purification**

117 The baculovirus (Bv) Bv-His-BAP1-FL-WT, Bv-His-BAP-UCH-WT and Bv-UCH-C91S mutant  
118 proteins were expressed in Bv-infected Sf9 cells and purified as previously described (16). The GST- and  
119 His-tagged BAP1 and ASXL2 proteins were expressed in *E. coli* BL21 (DE3) (Stratagene) and SG13009  
120 (S9) (Qiagen), respectively. The pETDuet-1-His-BAP1-ULD+ASXL2-AB protein complex was  
121 expressed in Rosetta 2 (DE3) pLysS (Millipore). The bacteria bearing the desired plasmids were  
122 propagated with aeration at 37°C in 1L of 2YT to an A<sub>600</sub> absorbance of approximately 0.6. IPTG was  
123 added to 1 mM, and growth was continued at 20°C overnight. The cells were harvested by centrifugation.

124 GST-fusion proteins were purified as described previously (22). The bacterial His-tagged proteins  
125 were purified under denaturing conditions (Qiagen) and refolded by dialysis as described previously (22).  
126 The recombinant human BAP1-FL-WT protein was purchased from Boston Biochem (E-345-050). The  
127 Duet-His-ULD/AB protein complex was purified under native purification conditions using Cobalt beads  
128 (Talon), followed by dialysis and concentration to desired concentration.

129 **GST association assays**

130 GST association assays were performed as described previously (23) using BB200 buffer (200  
131 mM NaCl, 20 mM Tris, pH 7.5, 0.2 mM EDTA, 10% Glycerol, 1 mM PMSF and 0.2% NP40) and  
132 BB500 (containing the same components as BB200 except that the concentration of NaCl was 500 mM).

133

### 134 **Dynamic light scattering (DLS)**

135 DLS was measured using DynaPro Titan (Wyatt Technology). Purified His-BAP1-ULD, His-AB  
136 and His-ULD/AB complex were in buffer containing 50 mM potassium phosphate, pH 7.5, 200 mM  
137 potassium chloride and 1mM TCEP. His-ULD was measured at 574  $\mu\text{M}$  concentration. His-AB was  
138 measured at 77  $\mu\text{M}$  concentration. The His-ULD/AB protein complex was measured at 70  
139  $\mu\text{M}$  concentration. Samples were spun in a tabletop microcentrifuge at 13,000 rpm for 10 minutes  
140 prior to measurements, and measurements were done at 10°C.

### 141 **Isothermal titration calorimetry (ITC)**

142 ITC was performed using Microcal ITC 200 (Microcal/Malvern Instruments). His-ULD and His-  
143 AB proteins were dialyzed in 50 mM potassium phosphate, pH 7.5, 200 mM potassium chloride, and 1  
144 mM TCEP. His-AB was placed in the sample cell at concentration 77  $\mu\text{M}$ . His-ULD was titrated into the  
145 sample cell at a concentration of 574  $\mu\text{M}$ . Two references were used. The first reference was titration of  
146 the buffer into His-AB protein. The second reference was titration of His-ULD protein into the buffer.  
147 Both reference values were subtracted from the experimental data. ITC calculations and fitting was  
148 performed with Origin 7 software, using autofit, 200 iterations. Based on the results, the stoichiometry  
149 and binding kinetics of the proteins were determined. The direct measurements of binding affinity ( $K_a$ ),  
150 enthalpy changes ( $\Delta H$ ) and binding stoichiometry ( $n$ ) were used to determine the Gibbs free energy  
151 changes ( $\Delta G$ ) and entropy changes ( $\Delta S$ ) using  $\Delta G = -RT \ln K_a = \Delta H - T\Delta S$  ( $R$  = gas constant;  $T$  = absolute  
152 temperature). Dissociation constant ( $K_d$ ) is  $1/K_a$ . Experiments were performed in duplicate. No  
153 uncertainty ranges are given due to the low number of technical replicates.

### 154 **Circular Dichroism (CD)**

155 The CD spectra (190-260 nm) were measured on a Jasco J-715 spectropolarimeter (Japan  
156 Spectroscopic Co.) at 25°C. The CD spectra were recorded using 0.1 cm path length quartz cuvette with  
157 the following measurement parameters: 190-260 nm; step resolution: 1 nm; speed: 20 nm/min;  
158 accumulations: 4; bandwidth: 1 nm. All measurements were performed in the following buffer: 50 mM

159 potassium-phosphate, pH 7.5, 300 mM KCl, 10% glycerol, 1 mM DTT and 1 mM PMSF. The data were  
160 processed using the Jasco Spectra Manager Suite.

### 161 **Ub-AMC assay**

162 The activity of BAP1 or BAP1-UCH proteins was determined by cleavage of ubiquitin-7-amido-  
163 4-methylcoumarin (Ub-AMC). Assays contained various concentrations of enzyme and substrate with and  
164 without His-AB or the His-ULD/AB complex as indicated in the figures in a reaction volume of 15  $\mu$ L of  
165 25 mM HEPES, pH 7.4, 150 mM NaCl, 5 mM DTT, 0.005% Tween20 in low-volume 384-well plates at  
166 room temperature. Fluorescence of free AMC at excitation and emission wavelengths of 355 nm and 460  
167 nm, respectively, was measured at 2 min intervals for 20 min in an Envision microplate reader.  
168 Background fluorescence in the absence of enzyme was subtracted from the data points, and the linear  
169 portion of the curve was fit to a straight line to determine velocity.

### 170 **Kinetic analysis: surface plasmon resonance (SPR)**

171 Interactions between the ASXL-AB and BAP1-ULD domains were studied by SPR using a  
172 Biacore T200 instrument. GST-antibody (Abcam ab9085) was coupled to all flow cells of a CM5 sensor  
173 chip using standard amine coupling procedures in a HEPES-buffered saline running buffer. After  
174 coupling of the GST antibody, the running buffer was changed to 25 mM HEPES, pH 7.4, 150 mM NaCl,  
175 5 mM DTT and 0.05% Tween20. GST-ULD was immobilized onto the chip surface at a ligand density of  
176 400 RU, followed by a 120-s stabilization period. A single concentration His-AB was then injected over  
177 both the reference cell, with GST antibody alone, and the flow cell covered with GST-ULD at 30  $\mu$ L/min.  
178 The binding reaction was monitored for 240 s followed by a 300-s dissociation time. Specific binding was  
179 determined by subtracting the refractive index change in the reference cell from the flow cell containing  
180 GST-ULD. After each concentration of His-AB, the GST-ULD was stripped from the surface using a 60-s  
181 injection of 20 mM glycine, pH 2.0 at 30  $\mu$ L/min, followed by another 120-s stabilization period. Fresh  
182 GST-ULD was then immobilized as above. Experiments were done in triplicate.

183 Interactions between the His-ULD/AB complex and full-length BAP1 or the BAP1-UCH domain  
184 were also studied using the Biacore T200 instrument. Full-length His-BAP1, GST-UCH, or GST alone



185 was directly immobilized to a CM5 sensor chip at a density of ~3000 RU using standard amine coupling  
186 procedures. The running buffer for the binding studies was 25 mM HEPES, pH 7.4, 250 mM NaCl, 5 mM  
187 DTT and 0.05% Tween20. The higher NaCl concentration was required to reduce nonspecific binding to  
188 the reference cell in the absence of protein. Various concentrations of His-ULD/AB complex were  
189 injected over the flow cells at 30 uL/min and the binding reaction monitored for 90 s followed by a 240-s  
190 dissociation time. Specific binding was determined by subtracting the refractive index change in the  
191 reference cell from the readings of the other three flow cells. After the 240-s dissociation time, most of  
192 the His-ULD/AB complex was completely dissociated. However, 1 M NaCl at 30 uL/min was injected for  
193 60 s over the flow cells to clear any remaining bound protein. Experiments were done in triplicate.

#### 194 **Sequence and structure analysis**

195 Open reading frame sequences for BAP1, UCHL1, UCHL3, UCHL5, ASXL1, ASXL2, and  
196 ASXL3 were obtained from NCBI for vertebrate species. Separately, the UCH or ASX sequences were  
197 aligned and codon selection scored using our previously published metrics (PMID: 28204942). COSMIC  
198 variants (PMID: 25355519) for BAP1 were extracted on June 20, 2018. Secondary structure predictions  
199 for proteins were performed using <http://cib.cf.ocha.ac.jp/bitool/MIX/>, a combination of Chou-Fasman,  
200 GOR, and Neural Network predictions. Conservation was highlighted onto the human protein model  
201 generated from PDB 6cga.

202

#### 203 **Results**

204

#### 205 **Bap1 and Asxl protein coexpression in single cell RNAseq datasets**

206 To build a cellular model of *Bap1* and *Asxl1-3* coexpression, we used the 53,760 cell dataset of  
207 20 tissues from mouse (PMID: 30283141). *Bap1* expression was found to vary in the average counts per  
208 cell and the number of cells expressing the gene, with tissues such as thymus showing the highest *Bap1*  
209 levels (Suppl. Fig. S1A). Co-segregating gene expression in those cells expressing *Bap1* versus those that  
210 do not for the thymus revealed 122/289 genes that positively correlated to be involved in cell cycling (p-

211 value,  $3.5e-61$ ) and several that were connected to BAP1 interaction pathways (Suppl. Fig. S1B).  
212 Interestingly, cancer-related genes such as *Fos* were negatively correlated with *Bap1*. Among the 20  
213 tissues, the majority of *Bap1*-expressing cells had none of the *Asxl1-3* genes expressed (60.7%), with  
214 21.1% of cells repressing *Asxl2*, 11.3% of cells with *Asxl1*, 5.9% of cells expressing both *Asxl1* and  
215 *Asxl2*, and 0.9% with *Asxl3* (Suppl. Fig. S1C), suggesting ASXL2 kinetic interactions are of the highest  
216 priority for ASXL proteins.

217 The breakdown of the 20 tissues showed a varying percentage of *Bap1* positive cells to have  
218 *Asxl1* or *Asxl2* expression, with tissues such as pancreas having the greatest *Asxl2* bias and those such as  
219 muscle having an *Asxl1* bias (Suppl. Fig. S1D). Correlation analysis of the single cells for each tissue  
220 revealed that liver and pancreas have higher correlations between *Asxl2* and *Bap1* expression levels  
221 (Suppl. Fig. S1E), with genes correlating to those *Bap1* and *Asxl2* positive-expressing cells having  
222 significantly enriched protein-protein interactions (PPI) and lipid metabolic process gene ontology (GO)  
223 for positively correlated genes and regulation of cell motility in negatively correlated genes (Suppl. Fig.  
224 S1F).

225

### 226 **Analysis of conserved and selected BAP1 and ASXL1-3 contact sites**

227 The domain structure of BAP1 is unique from other UCH proteins (Fig. 1A). The N-terminus of  
228 BAP1 has similarity to other mammalian UCHs (UCH-L1, UCH-L3, and UCH-L5); however, BAP1 also  
229 has several additional conserved motifs and domains throughout the remainder of the protein including  
230 the ULD found only in UCHL5. Alignments of the UCH domain of the four proteins and the ULD of  
231 BAP1 and UCH-L5 identify many amino acids conserved throughout, especially at sites with cancer  
232 (COSMIC) mutations within the UCH (Fig. 1B-C). Using the structure of *Drosophila* Calypso UCH/ULD  
233 interaction with Asx (PDB 6HGC) converted into human BAP1 UCH/ULD and ASXL2 merged with our  
234 previous models of interaction with H2A and Ubiquitin (16), we can pinpoint the human contact maps of  
235 the ULD with ASXL2 with high confidence (Fig. 1D, E). The BAP1 ULD contact amino acids have  
236 12/22 amino acids fixed throughout the evolution of both BAP1 and UCH-L5, yet 7/22 amino acids are

237 unique to BAP1, suggesting a lower kinetics of interaction between ASXL2 and UCH-L5 than with  
238 BAP1. The conservation of ASXL1-3 identifies a shared highly conserved ASXH domain critical for  
239 ULD interaction, with an additional conserved PHD-type domain being poorly defined (Fig. 1F). Of the  
240 BAP1 contact amino acids within ASXL2, 20/29 sites are conserved between *Drosophila* ASX and  
241 ASXL1-3 (Fig. 1G). A total of 23/29 BAP1 contact sites are conserved throughout ASXL1-3, suggesting  
242 that contact between ASXL1-3 with BAP1 are maintained throughout all three proteins.

243  
244 **Figure 1 BAP1 structure and evolution. A)** Open reading frame sequences were aligned for each UCH  
245 protein followed by assessment of amino acid conservation and codon selection. Number of each species  
246 sequences used is listed next to each name. The scores for each site were placed on a 21-codon sliding  
247 window, adding scores for 10 up- and down-stream of any site. Annotated domains are shown below  
248 each. **B)** Sequence alignments of UCH domain (red line) or ULD (blue line) of BAP1, UCHL5, UCHL3,  
249 and UCHL1 showing the human sequence of each with the consensus alignment information below each  
250 (\* = conserved in all species for each gene; = functionally conserved for each gene; = weakly conserved  
251 in each gene). Shown on the top is the number of COSMIC variants observed at each site (T = values  
252  $\geq 10$ ) and below that is the secondary structure annotated based on protein modeling of the UCH. The X in  
253 annotation marks amino acids in the enzyme active site. Amino acids highlighted in red are conserved in  
254 all sequences, those in gray are conserved in at least two different proteins, and those in cyan are  
255 conserved and unique to BAP1. Sequence alignment of the ULD of BAP1 and UCHL5 includes the  
256 *Drosophila* Calypso sequence and the ASX contact amino acids marked with X. **C)** COSMIC variants of  
257 the UCH annotated for variant impact and based on conservation with other UCH proteins with coloring  
258 based on panel B. **D-E)** Model of the BAP1-UCH domain with colors shown from the previous  
259 alignments with additional bound H2A (blue) with ubiquitin (yellow), and the ULD (conservation based  
260 on alignment in panel Fig. 1B) revealing additional BAP1 uniquely conserved amino acids for the  
261 stabilization by ASXL2 depicted in green near the UCH loop (cyan). The entire complex is shown in  
262 panel C and a zoom in view of ASXL2, ULD, and UCH interactions in panel D. **F)** Open reading frame

263 sequences aligned for ASX1-3 proteins followed by assessment of amino acid conservation and codon  
264 selection of all three combined (black). **G)** Sequence alignments of the AB boxes of ASXL1, ASXL2,  
265 and ASXL3, and *Drosophila* Asx. Amino acids in red are conserved in all three proteins, those in yellow  
266 shared in all three human sequences, those in magenta conserved at least in ASXL1, those in green at  
267 least in ASXL2, and those in cyan at least in ASXL3. Contact amino acids with BAP1 are marked with X.  
268

269 Of note, BAP1-UCH contains a larger loop than the other UCH proteins, with a high conservation  
270 of both these loop amino acids and of multiple amino acids structurally near this loop (Fig. 1B, D, E),  
271 suggesting that larger substrates would be accessible to the catalytic cleavage site only for BAP1 and not  
272 other UCH domains, yielding a BAP1-specific recruitment of proteins/domains such as Asx and ULD for  
273 enzyme regulation. ASXL functions as a molecular scaffold to recruit BAP1 to transcription factors,  
274 which specifically bind to its target genes. Then, BAP1 ubiquitin hydrolase specifically removes the  
275 ubiquitin from histones of chromatin to regulate these target genes. ASXL not only functions as a  
276 molecular scaffold for BAP1 but also greatly stimulates its activity. When mutations/deletions occur in  
277 *BAP1*, either they cause enzymatic loss-of-function of BAP1, or abolish BAP1's association with ASXL.  
278 Loss of binding to ASXL would dramatically decrease BAP1 deubiquitination activity, because of an  
279 inability to bring ASXL to BAP1's catalytic site. On the other hand, products of *ASXL* gene mutations  
280 that lose association with BAP1 also lead to BAP1 loss of function. The structure of the BAP/ASXL2  
281 tripartite complex has not been determined; however, the crystal structure of the *Drosophila* Calypso and  
282 its activating partner Asx was recently determined (21). The stoichiometry of BAP and ASXL1-3  
283 interaction and the kinetics remained unknown. Therefore, we initiated biochemical and biophysical  
284 analyses of the BAP1-UCH, BAP1-ULD, ASXL2-AB domains and protein complex.

285

## 286 **Purification of recombinant proteins and protein complex**

287 For single protein expression, His- or GST-tagged full-length BAP1, BAP1-UCH and BAP1-  
288 ULD domains were expressed in bacteria (Bac-) or baculovirus (Bv-), respectively (Fig. 2A). The reasons

289 that we expressed the proteins in baculovirus were in case post-translational modifications are needed for  
290 the protein functions and/or that other cellular factors are involved in the protein functions. All the  
291 baculovirus-expressed proteins and domains were soluble using Ni<sup>2+</sup>-NTA chromatography under native  
292 purification conditions (Fig. 2B) and the proteins were functional (see below). The bacterial-expressed  
293 GST-BAP1-UCH and GST-BAP1-ULD were soluble using GST-chromatography under native  
294 purification conditions (Fig. 2B) and the proteins were functional (see below). The bacterial-expressed  
295 His-BAP1-ULD and His-ASXL2-AB proteins were purified under denaturing conditions, followed by a  
296 re-naturation protocol that yielded soluble, highly active proteins (Fig. 2B). However, the yield of re-  
297 folded proteins was not sufficient for structural studies. We thus used the pETDuet co-expression system  
298 to co-express His-ULD and AB, or His-AB and ULD protein complexes in *E. coli* [Rosetta 2 (DE3)  
299 pLysS]. The His-ULD/AB protein complex was successfully co-expressed and then purified using cobalt  
300 beads (Talon) under native purification conditions. The protein complex was highly soluble and  
301 functional (Fig. 2B).

302

303 **Figure 2 Domain architecture of human BAP1 and ASXL2 and the proteins/domains used in this**  
304 **study. A)** Human BAP1 depicting ubiquitin C-terminal hydrolase domain (UCH; aa 1-240), BARD1 and  
305 BRCA1 binding domains, NHNY consensus sequence for interaction with HCF1, UCH37-like domain  
306 (ULD: aa 598-729), and nuclear localization signals (NLS). Domain structure of human ASXL2 contains  
307 highly conserved AB box and PHD domain. **B)** BAP1 and ASXL2 proteins produced in bacteria and  
308 baculovirus either singly or by co-expression. The proteins or protein complex were purified using either  
309 Ni-NTA, cobalt beads (Talon) or GST-resin. The purified proteins and protein complex were analyzed by  
310 NuPAGE and visualized by Coomassie staining.

311

312 **Biophysical and biochemical characterization of BAP1-UCH, BAP1-ULD, ASXL2-AB, and the**  
313 **UCH/ULD/AB complex**

314 To evaluate the behavior of singly-expressed proteins and co-expressed protein complex, DLS  
315 was used to examine the mono-dispersion of His-ULD, His-AB and His-ULD/AB complex. We first  
316 tested a full spectrum of buffer conditions for optimizing the solubility and stability of individual proteins  
317 and the protein complex. Under the optimal buffer condition found (50 mM potassium phosphate, pH 7.5,  
318 200 mM potassium chloride and 1 mM TCEP), His-AB and His-ULD were mono-dispersed 87% and  
319 88%, respectively. Each scan shows a larger species as well, which is assumed to be protein aggregation  
320 (Fig. 3A).

321

322 **Figure 3. Biochemical and biophysical analyses of purified proteins and protein complex from**  
323 **BAP1 and ASXL2. A)** Dynamic light scattering (DLS) was used to examine the mono-dispersion of His-  
324 ULD, His-AB and His-ULD/AB complex. Under the optimal buffer condition, His-ULD and His-AB  
325 proteins showed 88% and 87% mono-dispersion, while His-ULD/AB protein complex exhibited a higher  
326 degree (91.8%) of mono-dispersion, as directly measured by DLS. **B)** Isothermal titration calorimetry  
327 (ITC) was used to determine the thermodynamics and kinetics of domain-domain interactions between  
328 His-ULD and His-AB and their stoichiometry. 574  $\mu$ M His-ULD protein was titrated into 77 $\mu$ M His-AB  
329 protein in terms of molar ratio. ITC calculations derived from the direct measurements and curve fitting  
330 were done with Origin 7 software. The binding affinity with dissociation constant of the protein-protein  
331 interaction and the stoichiometry of protein complex were determined. **C)** Circular dichroism was  
332 performed to determine the secondary structure of purified His-ULD and His-AB proteins as well as the  
333 His-ULD/AB protein complex. Data were processed using the Jasco Spectra Manager Suite. **D)** Binding  
334 of co-purified His-ULD/AB and the UCH domain of BAP1, as demonstrated by GST-UCH pull down  
335 with recombinant His-ULD/AB complex.

336

337 When this ULD-AB complex forms together, the mono-dispersion is measured at 91.8%. This  
338 indicates a similar, or perhaps slightly higher stability of the complex than the isolated proteins. In  
339 addition, we see a shift in the scan to a smaller size complex when these protein domains are bound

340 together. This is contrary to what would typically be expected as proteins bind together. Based upon this  
341 result, it appears that the complex is more tightly packed spatially than the individual proteins. This result  
342 is consistent with the CD data presented, which show additional secondary structure formation attained  
343 during binding. In addition, these data were utilized for further ITC experiments (Fig. 3B) in calculating  
344 concentrations used, because it is assumed only the mono-dispersed species is capable of interacting  
345 properly with the other complex members.

346 From our previous studies (16), we learned that the BAP1-ULD domain interacts directly with the  
347 ASXL2-AB box. However, the binding kinetics and stoichiometry of interaction of the ULD domain and  
348 the AB box remained unknown. Using ITC, we have now determined the thermodynamics, kinetics, and  
349 stoichiometry of this domain-domain interaction. Highly purified His-ULD and His-AB proteins were  
350 critically equilibrated in the same buffer (50 mM potassium phosphate, pH 7.5, 200 mM potassium  
351 chloride and 1 mM TCEP). The His-AB was placed in the ITC cell with 77  $\mu$ M protein concentration  
352 while the titrated protein His-ULD was at 574  $\mu$ M protein concentration. We also set the references for  
353 each protein (see Materials & Methods) for subtraction from the experimental data. The data show that  $K_d$   
354 for interaction of His-ULD and His-AB is approximately 4.26  $\mu$ M (3.73  $\mu$ M-4.85  $\mu$ M). The stoichiometry  
355 of His-ULD to His-AB is 1:1 molar ratio (Fig. 3B). We also observed that the thermodynamics of the  
356 interaction has a  $\Delta H$  of -9.87 kcal/mol and  $\Delta S$  of -10.3 cal/mol/deg, indicating an exothermic interaction.  
357 These data are consistent with our previous studies that used computer modeling technology to predict the  
358 molecular model of BAP1-ULD interacting with ASXL2-AB (16). The interaction for both ULD and AB  
359 has a modest binding affinity dissociation constant. This result is consistent with expectations of  
360 formation of a protein-protein complex in a reversible manner.

361 From our computer molecular modeling studies, BAP1-ULD is predicted to form a few long  
362 helices, while ASXL-AB box is predicted to form five helices (16). We performed CD to determine the  
363 secondary structure of the purified recombinant protein His-ULD, His-AB and His-ULD/AB complex.  
364 The CD spectra of the domains and complex demonstrating that each adopts a partially helical  
365 conformation and has a high degree of secondary structure (Fig. 3C), While His-AB appears to be partly



366 unstructured as demonstrated by a broad minima at 208 nm, this minima is lessened in the His-ULD/AB  
367 complex. The complex also has increased alpha-helical content relative to the two monomer proteins as  
368 indicated by an increased minima at 222 nm.

369

### 370 **Direct interaction between BAP1-UCH, -ULD domains and ASXL2-AB domain**

371 Using computer molecular modeling of UCHL5 structures, we predicted that the BAP1-ULD  
372 domain folds back to the BAP1-UCH catalytic domain and that the ASXL2-AB box stabilizes the UCH  
373 catalytic loop via a unique BAP1 mechanism not seen in other UCH proteins, allowing for ubiquitin to fit  
374 into the active site (Fig. 1D,E). The GST-UCH directly interacted with the ULD domain but did not  
375 directly interact with the AB box, while the ULD domain recruited the AB box so that they form a stable  
376 complex (16). Now, we have co-expressed and co-purified the His-ULD/AB domain complex using the  
377 pETDuet system, which allowed us to obtain well-folded protein complex (Fig. 2B). To test this highly  
378 purified protein complex, a GST association assay was performed. GST or GST-UCH was pre-coated on  
379 the GST resin, followed by incubation with His-ULD/AB complex. After washing with BB200 or BB500  
380 buffer, the GST resin with protein complex was extracted, analyzed by SDS-PAGE, followed by  
381 Coomassie staining. The result showed that the His-ULD/AB complex was pulled down by GST-UCH  
382 but not by GST (Fig. 3D). The UCH/ULD/AB protein complex was indeed formed.

383

### 384 **Stimulation of BAP1 deubiquitinase activity by ASXL2-AB and ULD/AB complexes**

385 In order to measure BAP1 deubiquitinase activity, we used the fluorogenic substrate Ubiquitin-  
386 AMC (Ub-AMC). The activity of the UCH domain of BAP1 was 5-fold greater than the full-length  
387 BAP1, with specific activity values of  $358 \pm 6.6$  pmol AMC/min/pmol E and  $73 \pm 2.4$  pmol  
388 AMC/min/pmol E, respectively (Fig. 4). For both full-length BAP1 and the UCH domain, a point  
389 mutation of the cysteine residue at position 91 completely abolished enzyme activity (Fig. 4), consistent  
390 with previous observations (16).

391



392 **Figure 4. Cleavage of Ubiquitin-AMC mediated by full-length wild-type BAP1, full-length C91S**  
393 **BAP1 mutant, wild-type UCH domain of BAP1, or mutant C91S UCH domain.** Enzymes were  
394 expressed in baculovirus with an N-terminal His-tag and purified using standard procedures. A range of  
395 concentrations for each enzyme was incubated with 100 nM Ubiquitin-AMC in 20  $\mu$ L of 25 mM HEPES  
396 pH 7.4, 150 mM NaCl, 5 mM DTT and 0.005% Tween20 in 384-well plates. Fluorescence of free AMC  
397 was excited at 355 nm and emissions were measured at 460 nm at 2 min intervals. The resulting progress  
398 curves were fit to a straight line, and the velocities were plotted against enzyme concentration to obtain  
399 specific activities. Data points are means of duplicate determinations from a single experiment, which  
400 was repeated twice.

401  
402 The ASXL-AB box stimulates BAP1 deubiquitinase activity in the Ub-AMC assay (16). In this  
403 study, we further characterized this effect by testing increasing concentrations of ASXL2-AB in the  
404 presence of a substrate titration of Ub-AMC. ASXL2-AB dose-dependently increased the maximal  
405 velocity of BAP1 cleavage of Ub-AMC by 2.5-fold (Fig. 5A). The  $K_m$  values for Ub-AMC in the  
406 presence of increasing concentrations of ASXL2-AB ranged from 4-9 mM and did not correlate with  
407 ASXL2-AB concentration, suggesting that the ASXL2-AB box stimulates BAP1 enzyme activity by  
408 increasing its  $V_{max}$ , rather than the  $K_m$  for Ub-AMC. In addition, from these data we were able to obtain a  
409 functional potency for ASXL2-AB stimulation of BAP1 enzyme activity by plotting the  $V_{max}$  values for  
410 BAP1 enzyme activity against the concentration of ASXL2-AB box (Fig. 5B). These data fit well to a  
411 typical one-site dose response curve with a Hill slope of 1.0 and an  $EC_{50}$  of 0.96 nM (95%CI: 0.42-2.4  
412 nM) (Fig. 5B).

413  
414 **Figure 5. Effects of the AB box of ASXL2 and the ULD/AB complex of BAP1 mediated cleavage of**  
415 **Ubiquitin-AMC.** A) Ubiquitin-AMC substrate titrations were incubated with full-length BAP1 (3 nM)  
416 in the presence of increasing concentrations of AB in assay buffer as described in Materials and Methods.  
417 The resulting progress curves were fit to a straight line and the velocities plotted against Ubiquitin-AMC

418 concentration and the data fit to the Michaelis-Menton equation. **B)** Potency of AB-mediated stimulation  
419 of maximal velocity of BAP1. Each  $V_{max}$  value from panel **A** was plotted against AB concentration, and  
420 the data fit to one-site dose response equation as described in Materials and Methods. **C)** Full-length  
421 BAP1 was titrated in the presence of increasing concentrations of ULD/AB complex and 100 nM  
422 Ubiquitin-AMC in assay buffer as described in Materials and Methods. The resulting progress curves  
423 were fit to a straight line, and the velocities were plotted against enzyme concentration to obtain specific  
424 activity. **D)** Potency of ULD/AB complex on specific activity of BAP1. Slopes from panel **C** were  
425 plotted against ULD/AB concentration and the data fit to one-site dose response equation as described in  
426 Materials and Methods. Data points are means of duplicate determinations from a single experiment,  
427 which was repeated twice.

428

429 We then determined the functional potency of the His-ULD/AB complex expressed in the pET-  
430 Duet-1 co-expression vector. Since we established that ASXL2-AB stimulates BAP1 deubiquitinase  
431 activity by increasing the  $V_{max}$ , we simply measured the specific activity of BAP1 in the presence of  
432 increasing concentrations of His-ULD/AB in order to conserve substrate (Fig. 5C). The His-ULD/AB  
433 complex stimulated BAP1 specific activity 4.5 fold using 100 nM Ub-AMC (Fig. 5C). Data plotting the  
434 specific activity values against ULD/AB concentration fit well to a one-site dose response curve with a  
435 Hill slope of 1.0 and an  $EC_{50}$  of 2.8 nM (95%CI: 1.0-7.5 nM) (Fig. 5D), which is within 3-fold of the  
436 functional potency we obtained for ASXL2-AB.

437

### 438 **Kinetic studies of the interactions between AB and ULD domains, ULD/AB complex and full-length** 439 **BAP and BAP-UCH**

440 Using SPR, we tested the affinity and kinetics of BAP1-ULD and ASXL2-AB. ASXL2 was  
441 found to bind to GST-ULD, but not GST-UCH or GST alone (Fig. 6A). ASXL2 bound with moderate  
442 affinity to GST-ULD, with a steady state  $K_D$  value of 134 nM (95% CI: 120-149 nM), (Fig. 6 B,C,D).  
443 The kinetics of the interaction was relatively fast, with an association rate of  $3.8 \times 10^4 \text{ M}^{-1} \text{ s}^{-1}$  and a

444 dissociation rate of  $2.4 \times 10^{-3} \text{ s}^{-1}$  (Fig. 6D). The  $K_D$  of 67 nM determined by these kinetic parameters were  
445 in good agreement with the  $K_D$  obtained from steady-state analysis.

446

447 **Figure 6. Characterization of the binding of the AB box to the BAP1 ULD domain, as assessed by**

448 **SPR. A)** AB box (200 nM) binds to GST-tagged ULD domain of BAP1, but not the UCH domain or

449 GST alone. Data are means of duplicates +/- SEM. **B)** Kinetics of AB binding to GST-ULD. Kinetic

450 parameters were determined from one-site binding model using Biacore evaluation software. Data

451 represent means of duplicate determinations. **C)** Steady-state saturation binding curve of AB binding to

452 ULD.  $K_D$  and  $B_{\max}$  values were determined from one-site binding model in GraphPad Prism. Data points

453 are the means +/- SEM of duplicate determinations. **D)** Equilibrium binding and kinetic parameters for

454 interaction of AB and ULD determined from **B** and **C**.

455

456 ASXL2-AB by itself did not bind to the UCH domain of BAP1 as determined by SPR (Fig. 6A).

457 Our hypothesis is that both the UCH and ULD domains of BAP1 interact with ASXL2-AB to stabilize the

458 catalytic loop of the UCH domain. Therefore, we investigated the binding of the ULD/AB complex to

459 both the UCH domain and full-length BAP1 using SPR. The ULD/AB complex binds to both full-length

460 BAP1 and GST-UCH with relatively low affinity, but did not bind GST alone (Fig. 7A). The steady-state

461  $K_D$  values for full-length BAP1 and GST-UCH were 1910 nM (95% CI: 1600-2400 nM) and 740 nM

462 (95% CI: 580-950), respectively (Fig. 7D). The kinetics of the interaction between the ULD/AB complex

463 and either full-length BAP1 (Fig. 7C) or GST-UCH (Fig. 7B) were characterized by fast association and

464 dissociation rates. The association rates of ULD/AB binding were  $3.9 \times 10^4 \text{ M}^{-1} \text{ s}^{-1}$  and  $1.9 \times 10^4 \text{ M}^{-1} \text{ s}^{-1}$

465 for full-length BAP1 and GST-UCH, respectively, and the dissociation rates were  $0.033 \text{ s}^{-1}$  and  $0.044 \text{ s}^{-1}$ ,

466 respectively (Fig. 7B,C,D). The  $K_D$  values of 850 nM and 2300 nM for BAP1 and GST-UCH,

467 respectively, that were obtained from these kinetic parameters, were in good agreement with those

468 calculated from steady state analysis (Fig. 7B,C,D).

469

470 **Figure 7. Characterization of the binding of ULD/AB complex to BAP1 and BAP1-UCH domain as**  
471 **assessed by SPR. A)** ULD/AB complex binds to UCH domain and full length BAP1 but not GST.  
472 Steady-state saturation binding curves fit to a one-site binding model. Data are duplicate determinations  
473 +/- SEM. **B** and **C**, Kinetics of ULD/AB binding to UCH (**B**) and full length BAP1 (**C**). Kinetic  
474 parameters determined from one-site binding model in Biacore evaluation software. Data are means of  
475 duplicate determinations. **D)** Equilibrium binding and kinetic parameters for interaction of ULD/AB and  
476 UCH or full-length BAP1 determined from **A-C**.

477

#### 478 **Discussion**

479 In this report, we have characterized protein-protein interactions between BAP1 and ASXL2  
480 utilizing biochemical and biophysical approaches, as well as enzymatic activity analyses. We have  
481 investigated the molecular dynamics, kinetics, and stoichiometry of these intra-molecule and inter-  
482 molecule domain-domain interactions. We draw the following conclusions. First, all of the single- or co-  
483 expressed and purified recombinant BAP1 and ASXL2 domain/proteins or protein complexes from both  
484 bacteria and baculovirus are well-folded in structure and are functionally active. Second, the interaction  
485 between BAP1 and ASXL2 is direct, specific, and stable to *in vitro* biochemical and biophysical  
486 manipulations. The association of the AB-box greatly stimulates BAP1 deubiquitinase activity. This  
487 interaction does not require post-translational modifications. Both bacterial- and baculoviral-expressed  
488 BAP1 or BAP1-UCH were enzymatically active and the enzymatic activity increased greatly upon  
489 ASXL2-AB box stimulation. A stable ternary complex was formed in UCH/ULD/AB domains. Third, the  
490 binding affinity of the ULD domain of BAP to the AB box of ASXL2 is very high with fast association  
491 and slow dissociation rates. One molecule of the ULD domain directly interacts with one molecule of the  
492 AB Box. Fourth, the formation of this ULD/AB complex with the UCH domain is a single-step event  
493 with fast association and slow dissociation rates, indicating that this interaction occurs very rapidly.

494 To further characterize interactions of domain-domain and tripartite complex between intra-  
495 molecule and inter-molecules of BAP1 and ASXL2 proteins, we applied biochemical and biophysical  
496 approaches. All these highly purified single- or co-expressed proteins are well structured and capable of  
497 folding properly, which allowed us to study the dynamic kinetics of their interactions and stoichiometry  
498 of the protein complex association by ITC and SPR (Fig. 2B, Fig. 3A-C). More importantly, the high  
499 quality of the bacterial- or baculoviral-expressed proteins and protein complexes are highly functional,  
500 which enabled us to perform highly sensitive assays to evaluate deubiquitinase-specific activity of BAP1  
501 and the direct effects of stimulation of ASXL2 on BAP1 enzymatic activity (Figs. 4, 5). These domain-  
502 domain interactions and ternary complex interactions were direct and stable (Fig. 3D) and do not require  
503 post-translational modifications. We not only were able to reconstitute the tripartite domain complex *in*  
504 *vitro*, but also were able to study the real-time dynamic kinetics of domain-domain and tripartite domain  
505 interactions. The binding mode either for AB on ULD, or ULD/AB on UCH are a single-step event with  
506 fast association and slow dissociation rates, indicating the interaction is very rapid (Figs. 6, 7). Moreover,  
507 the stoichiometry of AB and ULD association occurs via one molecule of AB binding to one molecule of  
508 ULD with high affinity (Fig. 3B), which is consistent with the crystal structure of *Drosophila* Calypso /  
509 Asx. The stoichiometry of Calypso/Asx was 1:1 molar ratio in low protein concentration, and 2:2 molar  
510 ratio in high protein concentration (21). Crystal structure work on the deubiquitinase Calypso, the  
511 *Drosophila* counterpart of BAP1, and its activating deubiquitinase adaptor (Deubad) protein  
512 partner ASX have provided a structural basis to interpret studies demonstrating that the  
513 ASXL1/2 Deubad domains bind tightly to BAP1, and thereby activate the PR-DUB complex by  
514 forming a composite binding site for ubiquitin (21). As in our study, Foglizzo et al. (21) showed  
515 that mutations at the juncture between DUB, Deubad, and ubiquitin have a deleterious effect on  
516 the ability of the PR-DUB to interact with ubiquitin.

517 We previously showed that the AB box of ASXL2 is the minimal domain required to interact  
518 with and stimulate the deubiquitinase activity of BAP1. Mutations in the AB box of ASXL2 or in the

519 ULD domain of BAP1 either partially or completely impacted AB and ULD interaction and UCH  
520 ubiquitin hydrolase activity. In this study, we further quantified the AB box protein stimulation on either  
521 full-length BAP1 or UCH domain deubiquitinase activity. We observed that ASXL2-AB dose-  
522 dependently increased the maximal velocity of BAP1 cleavage of Ub-AMC. Moreover, the ULD/AB  
523 complex also increased the maximal velocity of BAP1 cleavage of Ub-AMC in a dose-dependent manner.  
524 The data fit well into a one-site dose response equation. The AB box increases the maximal velocity of  
525 BAP1-mediated cleavage of Ub-AMC rather than increasing the  $K_m$  for this substrate. This is consistent  
526 with our molecular modeling data suggesting that the AB box does not induce a conformational change in  
527 the substrate's binding pocket, but rather binds to the ULD domain and stabilizes the UCH loop of BAP1.  
528 The potency of the AB box for stimulating BAP1 mediated cleavage of Ub-AMC is similar to the  
529 concentration of BAP1 in the enzyme assay, which suggests a 1:1 interaction. This is consistent with the  
530 ITC results reported here.

531         Interestingly, the ULD/AB complex, but not the AB box alone, was able to bind the BAP1-UCH  
532 domain, as determined by SPR, suggesting that interaction with the ULD domain is essential for  
533 stabilizing the UCH domain of BAP1. As the ULD is also found in UCHL5, this makes sense. In  
534 addition, most of the affinity for the AB box for BAP1 is through the ULD domain, as this interaction had  
535 10-20 fold higher affinity compared to the affinity of the ULD/AB complex for the UCH domain. These  
536 data suggest that the AB box binds the ULD domain first, and this complex then interacts with the BAP1-  
537 UCH domain to stimulate enzyme activity.

538         This is the first quantitative assessment of the inter- and intra-molecular interactions of the BAP1  
539 tumor suppressor and its obligate partner for enzymatic activity, ASXL2, including the mode by which  
540 the ASXL2-AB box mediates BAP1 deubiquitinase activity. The tripartite (UCH/ULD/AB) domain-  
541 domain interactions described here explain the loss of the BAP1 deubiquitinase activity when tumor-  
542 associated mutations in *BAP1* occur outside of the catalytic UCH domain, each failing to productively  
543 recruit the AB box to the wild-type BAP1 catalytic site via the ULD, resulting in loss of BAP1  
544 deubiquitinase activity.

545 In summary, through an integrated use of molecular biology, biochemistry, and biophysics  
546 strategies, we have provided evidence to support the molecular mechanism for ASXL2-mediated BAP1  
547 deubiquitinase activity. ASXL functions as a molecular scaffold through its AB box to recruit the ULD  
548 domain of BAP1 to transcription factors, which specifically bind to its target genes. Then the UCH  
549 catalytic domain of BAP1 ubiquitin hydrolase specifically removes the ubiquitin from histones on  
550 chromatin to regulate target genes. ASXL2 not only functions as a molecular scaffold for BAP1 but also  
551 greatly stimulates its enzymatic activity. Loss of binding to ASXL2 would dramatically decrease BAP1  
552 deubiquitination activity and thereby lead to BAP1 dependent alterations in chromatin state/gene  
553 expression in human cancers and other diseases. Furthermore, small-molecule approaches to reactivate  
554 latent wild-type UCH activity of these mutants occurring in a subset of BAP1-mutant cancers might be  
555 therapeutically viable.

556

## 557 **Acknowledgments**

558 We thank Katherine L.B. Borden and Michael Osborne (University of Montreal) for their advice and  
559 suggestions related to this project and manuscript. This work was supported by NCI grants  
560 R01CA175691 (J.R. Testa, F.J. Rauscher), P30CA010815 (F.J. Rauscher), P30CA006927 (Fox Chase  
561 Cancer Center), R01CA163761 (F.J. Rauscher), and NIH Office of the Director grant K01ES025435  
562 (J.W. Prokop). Support for Shared Resources was provided by P30CA010815 to The Wistar Institute.  
563 Also supported by the Jayne Koskinas Ted Giovanis Foundation for Health and Policy (F.J. Rauscher),  
564 the Palmira and James Nicolo Family Research Fund (S.B. Malkowicz), Local #14 Mesothelioma Fund of  
565 the International Association of Heat and Frost Insulators and Allied Workers (J.R. Testa), Ovarian  
566 Cancer Research Fund Alliance (F.J. Rauscher), Samuel Waxman Cancer Research Foundation (F.J.  
567 Rauscher), Susan G. Komen grant KG110708 (F.J. Rauscher), and Office of the Assistant Secretary of  
568 Defense for Health Affairs, through the Breast Cancer Research Program, under Award numbers



569 W81XWH-17-1-0506, W81XWH-14-1-0235 and W81XWH-11-1-0494 (F.J. Rauscher). This work was  
570 also supported by grants 1K22A154600 and 1R03A188439 (E.J. Kennedy).

571

## 572 **Conflicts of interest**

573 The authors declare no potential conflicts of interest.

574

## 575 **References**

- 576 1. Jensen DE, Proctor M, Marquis ST, Gardner HP, Ha SI, Chodosh LA, et al. BAP1: a novel  
577 ubiquitin hydrolase which binds to the BRCA1 RING finger and enhances BRCA1-mediated cell growth  
578 suppression. *Oncogene*. 1998;16(9):1097-112. Epub 1998/04/07.
- 579 2. Nishikawa H, Wu W, Koike A, Kojima R, Gomi H, Fukuda M, et al. BRCA1-associated protein  
580 1 interferes with BRCA1/BARD1 RING heterodimer activity. *Cancer Res*. 2009;69(1):111-9. Epub  
581 2009/01/02.
- 582 3. Misaghi S, Ottosen S, Izrael-Tomasevic A, Arnott D, Lamkanfi M, Lee J, et al. Association of C-  
583 terminal ubiquitin hydrolase BRCA1-associated protein 1 with cell cycle regulator host cell factor 1. *Mol*  
584 *Cell Biol*. 2009;29(8):2181-92. Epub 2009/02/04.
- 585 4. Gaytan de Ayala Alonso A, Gutierrez L, Fritsch C, Papp B, Beuchle D, Muller J. A genetic  
586 screen identifies novel polycomb group genes in *Drosophila*. *Genetics*. 2007;176(4):2099-108. Epub  
587 2007/08/25.
- 588 5. Scheuermann JC, de Ayala Alonso AG, Oktaba K, Ly-Hartig N, McGinty RK, Fraterman S, et al.  
589 Histone H2A deubiquitinase activity of the Polycomb repressive complex PR-DUB. *Nature*.  
590 2010;465(7295):243-7. Epub 2010/05/04.
- 591 6. Inobe T, Matouschek A. Paradigms of protein degradation by the proteasome. *Curr Opin Struct*  
592 *Biol*. 2014;24:156-64. Epub 2014/03/19.
- 593 7. Isaksson A, Musti AM, Bohmann D. Ubiquitin in signal transduction and cell transformation.  
594 *Biochim Biophys Acta*. 1996;1288(1):F21-9. Epub 1996/08/08.
- 595 8. Kadariya Y, Cheung M, Xu J, Pei J, Sementino E, Menges CW, et al. Bap1 Is a Bona Fide Tumor  
596 Suppressor: Genetic Evidence from Mouse Models Carrying Heterozygous Germline Bap1 Mutations.  
597 *Cancer Res*. 2016;76(9):2836-44. Epub 2016/02/21.
- 598 9. Bott M, Brevet M, Taylor BS, Shimizu S, Ito T, Wang L, et al. The nuclear deubiquitinase BAP1  
599 is commonly inactivated by somatic mutations and 3p21.1 losses in malignant pleural mesothelioma. *Nat*  
600 *Genet*. 2011;43(7):668-72. Epub 2011/06/07.
- 601 10. Harbour JW, Onken MD, Roberson ED, Duan S, Cao L, Worley LA, et al. Frequent mutation of  
602 BAP1 in metastasizing uveal melanomas. *Science*. 2010;330(6009):1410-3. Epub 2010/11/06.
- 603 11. Testa JR, Cheung M, Pei J, Below JE, Tan Y, Sementino E, et al. Germline BAP1 mutations  
604 predispose to malignant mesothelioma. *Nat Genet*. 2011;43(10):1022-5. Epub 2011/08/30.
- 605 12. Abdel-Rahman MH, Pilarski R, Cebulla CM, Massengill JB, Christopher BN, Boru G, et al.  
606 Germline BAP1 mutation predisposes to uveal melanoma, lung adenocarcinoma, meningioma, and other  
607 cancers. *J Med Genet*. 2011;48(12):856-9. Epub 2011/09/24.
- 608 13. Carbone M, Yang H, Pass HI, Krausz T, Testa JR, Gaudino G. BAP1 and cancer. *Nat Rev*  
609 *Cancer*. 2013;13(3):153-9. Epub 2013/04/04.



- 610 14. Pilarski R, Rai K, Cebulla C, Abdel-Rahman M. BAP1 Tumor Predisposition Syndrome. In:  
611 Adam MP, Ardinger HH, Pagon RA, Wallace SE, Bean LJH, Stephens K, et al., editors.  
612 GeneReviews((R)). Seattle (WA)2016.
- 613 15. Wiesner T, Obenauf AC, Murali R, Fried I, Griewank KG, Ulz P, et al. Germline mutations in  
614 BAP1 predispose to melanocytic tumors. *Nat Genet.* 2011;43(10):1018-21. Epub 2011/08/30.
- 615 16. Peng H, Prokop J, Karar J, Park K, Cao L, Harbour JW, et al. Familial and Somatic BAP1  
616 Mutations Inactivate ASXL1/2-Mediated Allosteric Regulation of BAP1 Deubiquitinase by Targeting  
617 Multiple Independent Domains. *Cancer Res.* 2018;78(5):1200-13. Epub 2017/12/30.
- 618 17. Abdel-Wahab O, Adli M, LaFave LM, Gao J, Hricik T, Shih AH, et al. ASXL1 mutations  
619 promote myeloid transformation through loss of PRC2-mediated gene repression. *Cancer Cell.*  
620 2012;22(2):180-93. Epub 2012/08/18.
- 621 18. Bainbridge MN, Hu H, Muzny DM, Musante L, Lupski JR, Graham BH, et al. De novo  
622 truncating mutations in ASXL3 are associated with a novel clinical phenotype with similarities to  
623 Bohring-Opitz syndrome. *Genome Med.* 2013;5(2):11. Epub 2013/02/07.
- 624 19. Hoischen A, van Bon BW, Rodriguez-Santiago B, Gilissen C, Vissers LE, de Vries P, et al. De  
625 novo nonsense mutations in ASXL1 cause Bohring-Opitz syndrome. *Nat Genet.* 2011;43(8):729-31. Epub  
626 2011/06/28.
- 627 20. Argote A, Mora-Hernandez O, Milena Aponte L, Barrera-Chaparro DI, Munoz-Ruiz LM,  
628 Giraldo-Mordecay L, et al. Cardiovascular Risk Factors and Carotid Intima-Media Thickness in a  
629 Colombian Population With Psoriasis. *Actas dermo-sifiliograficas.* 2017;108(8):738-45. Epub  
630 2017/07/01. Factores de riesgo cardiovascular y grosor de la intima media carotidea en una poblacion  
631 colombiana con psoriasis.
- 632 21. Foglizzo M, Middleton AJ, Burgess AE, Crowther JM, Dobson RCJ, Murphy JM, et al. A  
633 bidentate Polycomb Repressive-Deubiquitinase complex is required for efficient activity on nucleosomes.  
634 *Nat Commun.* 2018;9(1):3932. Epub 2018/09/28.
- 635 22. Peng H, Begg GE, Schultz DC, Friedman JR, Jensen DE, Speicher DW, et al. Reconstitution of  
636 the KRAB-KAP-1 repressor complex: a model system for defining the molecular anatomy of RING-B  
637 box-coiled-coil domain-mediated protein-protein interactions. *J Mol Biol.* 2000;295(5):1139-62. Epub  
638 2000/02/02.
- 639 23. Peng H, Begg GE, Harper SL, Friedman JR, Speicher DW, Rauscher FJ, 3rd. Biochemical  
640 analysis of the Kruppel-associated box (KRAB) transcriptional repression domain. *J Biol Chem.*  
641 2000;275(24):18000-10. Epub 2000/04/05.
- 642  
643

644 **Supporting information Figure S1 *BAP1* expression in mouse single cell datasets.** **A)** The average  
645 counts per million of *Bap1* for 20 mouse tissues (x-axis) and the percent of cells in the tissue with an  
646 expression greater than 10 counts for *Bap1* (y-axis). **B)** Genes co-expressed in *Bap1* expressing thymus  
647 cells. The x-axis shows the log<sub>2</sub> fold change of normalized counts for *Bap1* expressing cells and those  
648 without *Bap1*. Number of genes identified are shown in the top corners. **C)** Of the *Bap1* expressing cells,  
649 the breakdown of those expressing the different *Asx11-3* genes. The values are for the average among the  
650 20 tissues with the standard deviation shown next to the average. **D)** Breakdown of the *Asx11* and *Asx12*  
651 values over the 20 tissues from panel **B**. **E)** Correlation analysis of *Bap1* and *Asx12* in the 20 tissues. The  
652 Spearman's rank correlation is shown in the legend for each tissue. **F)** Genes that correlate with *Bap1* and  
653 *Asx12* expression in both the liver and pancreas with genes counts shown in the top corners and GO  
654 enriched terms colored cyan or red.



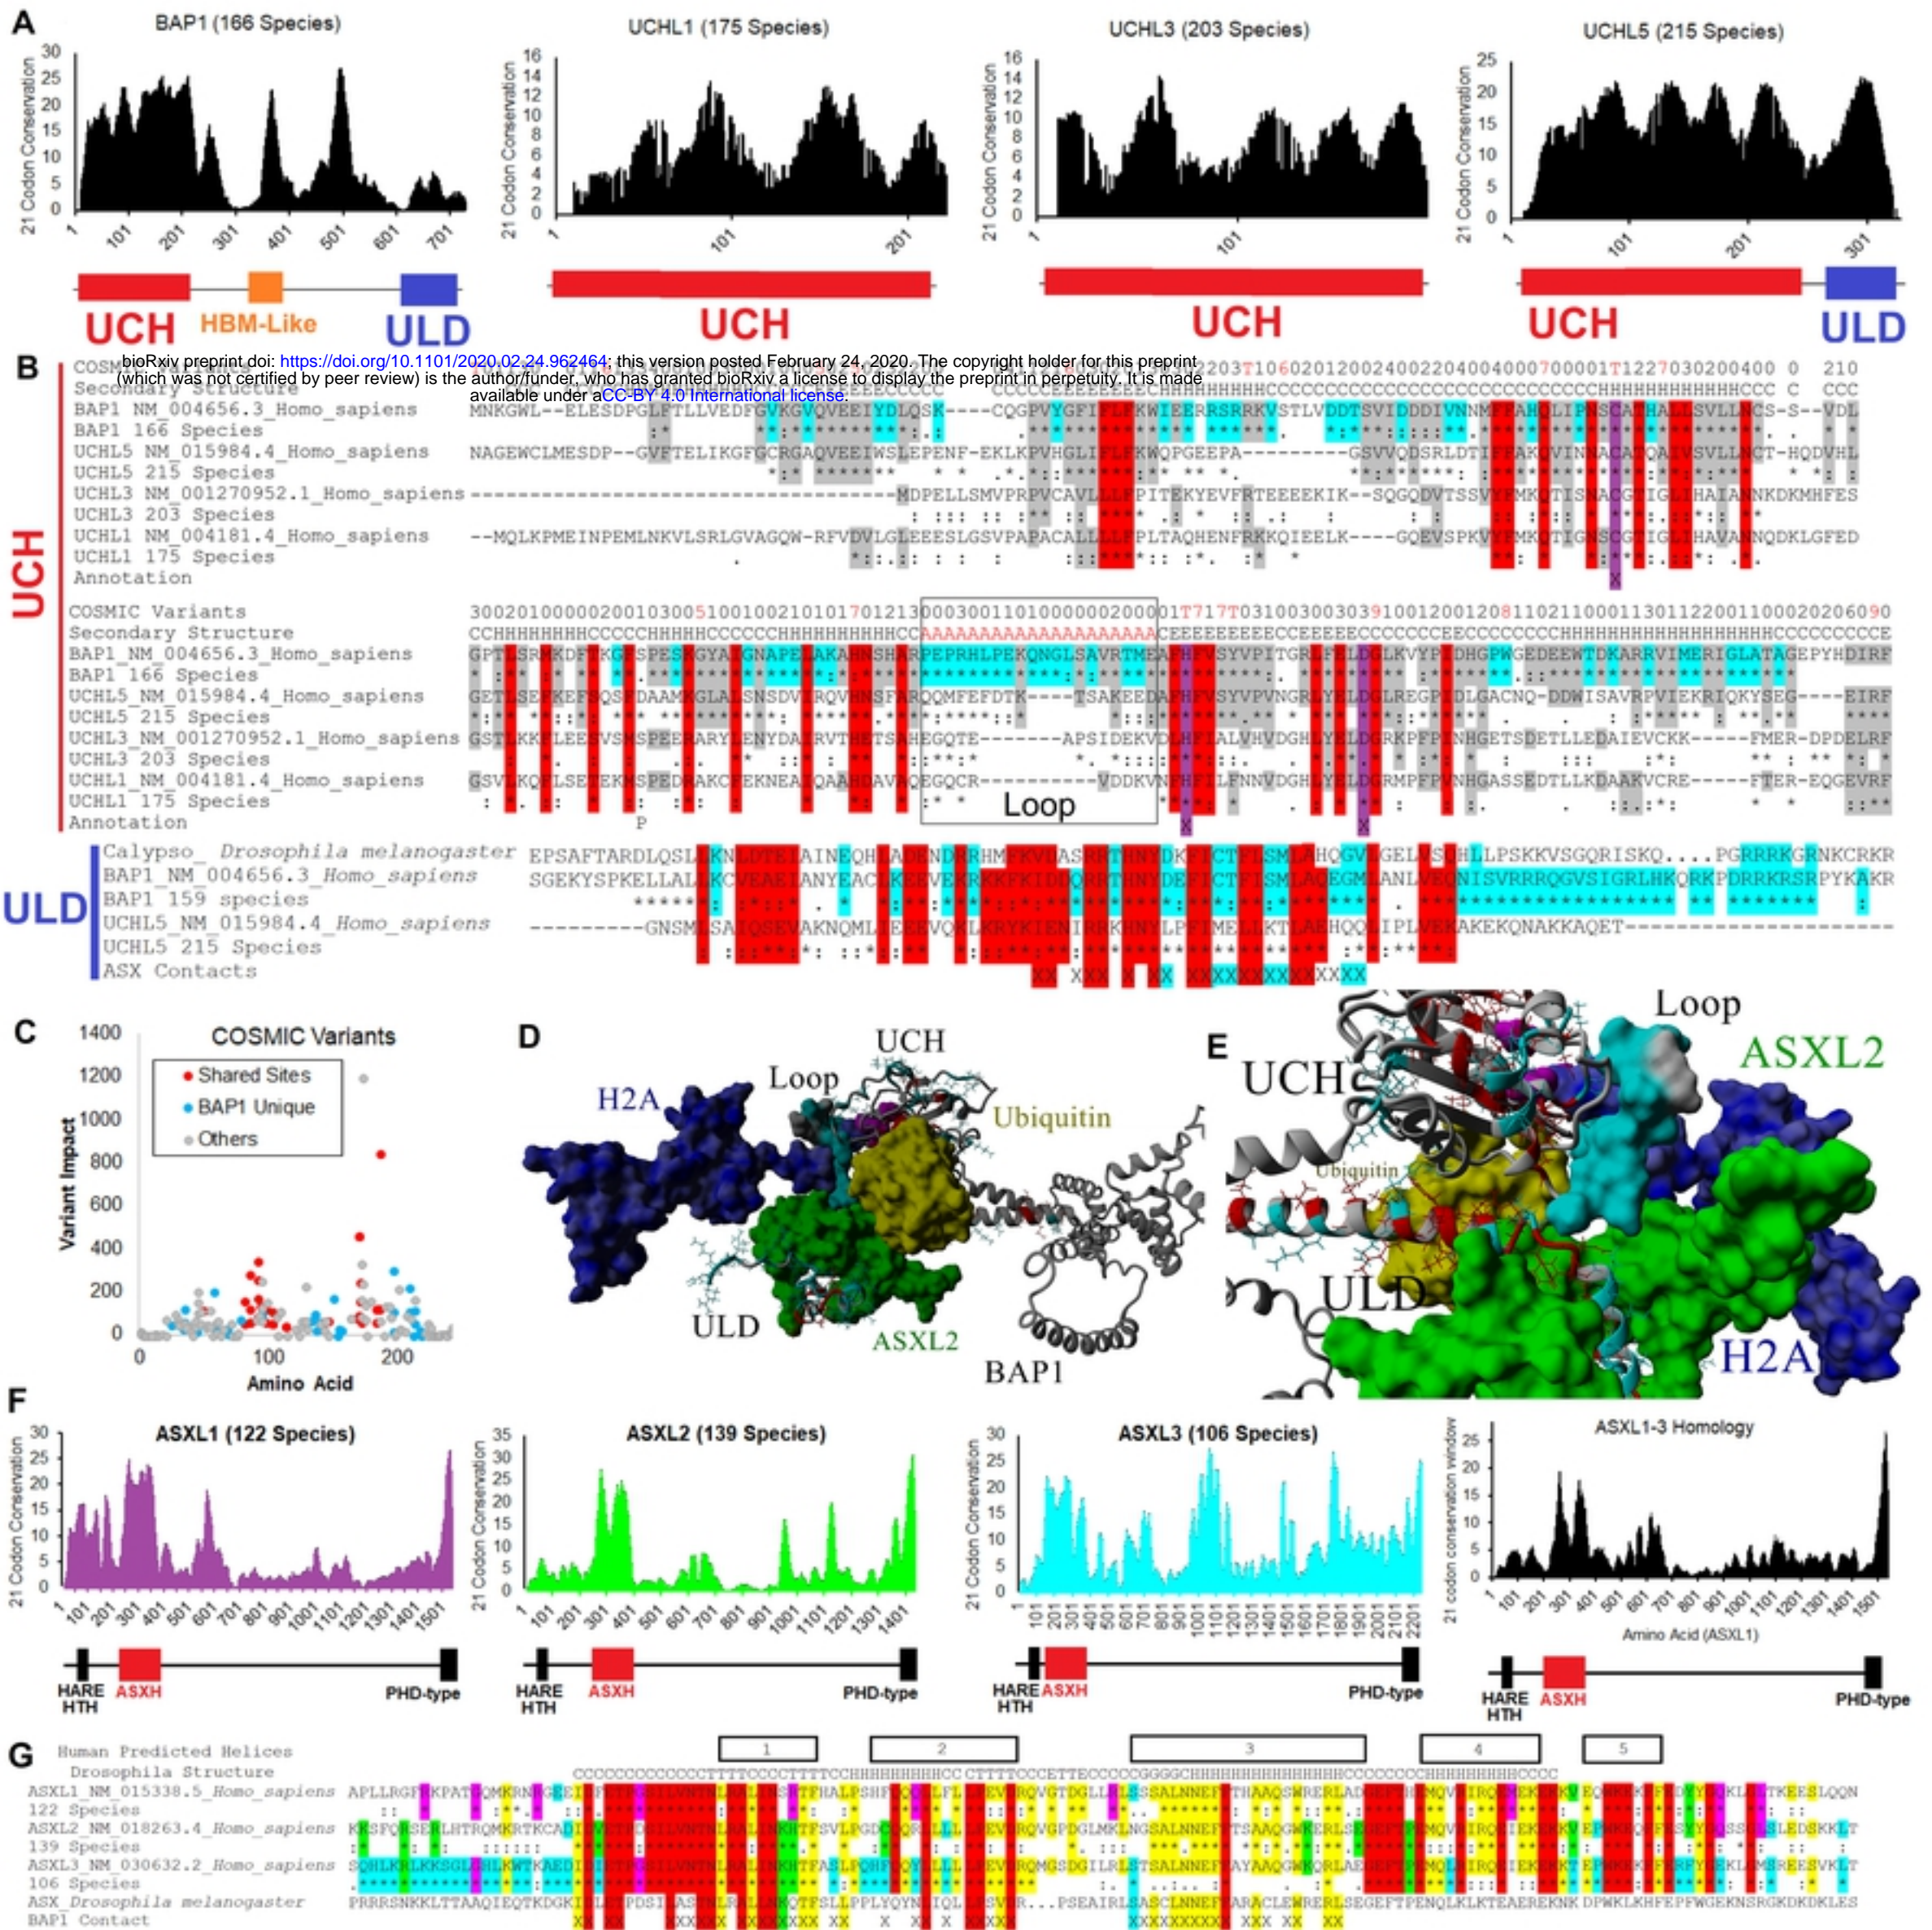

Figure 1



Figure 2

A

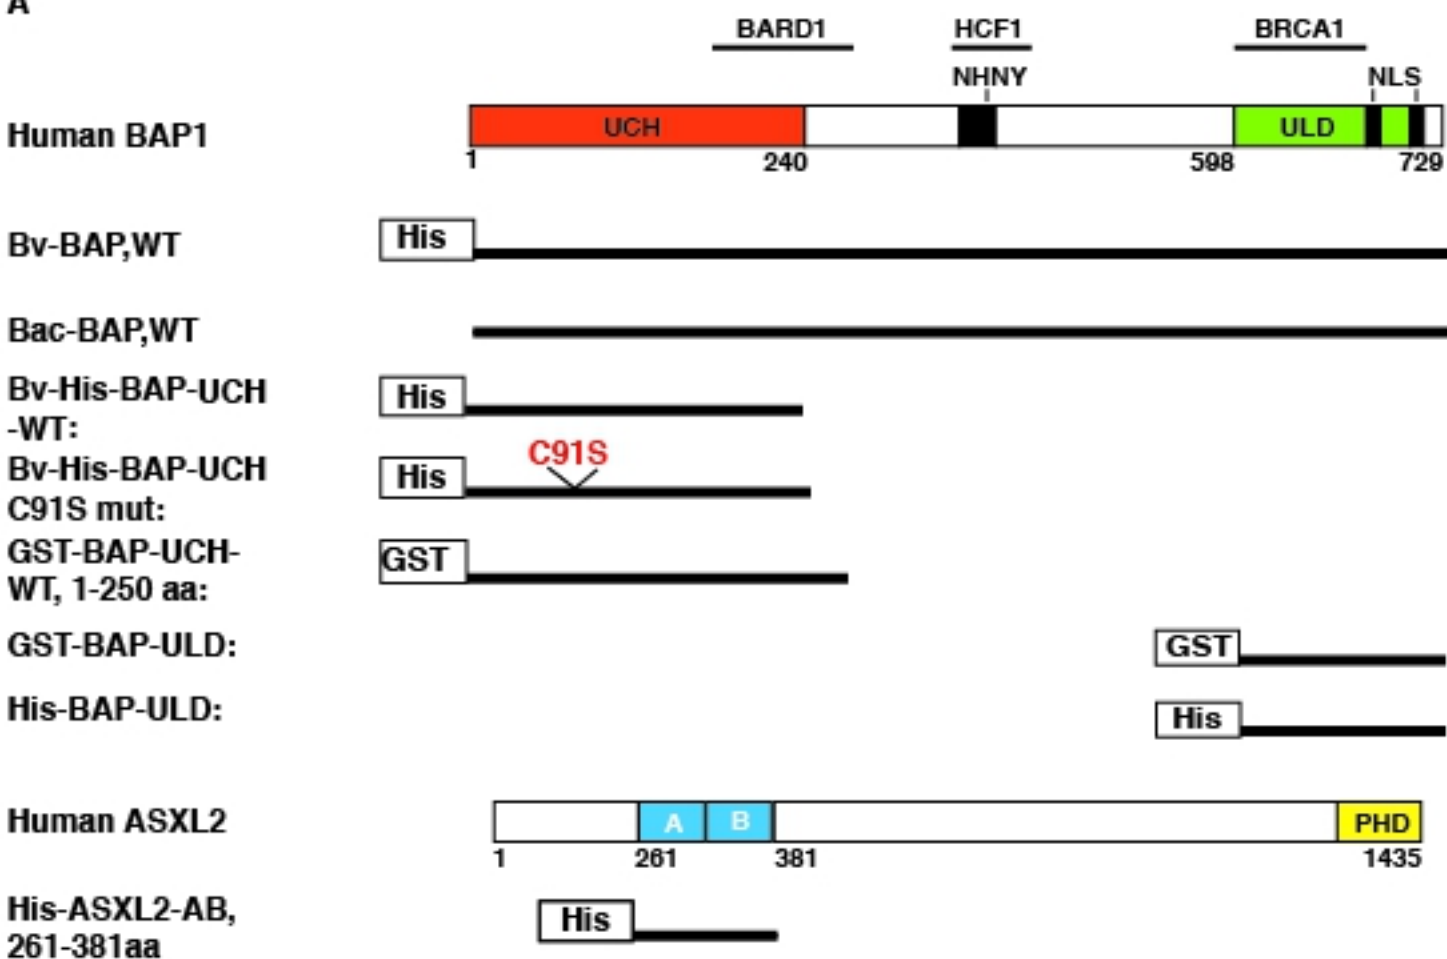

B: BAP and ASXL2 proteins (Single and co-expression)

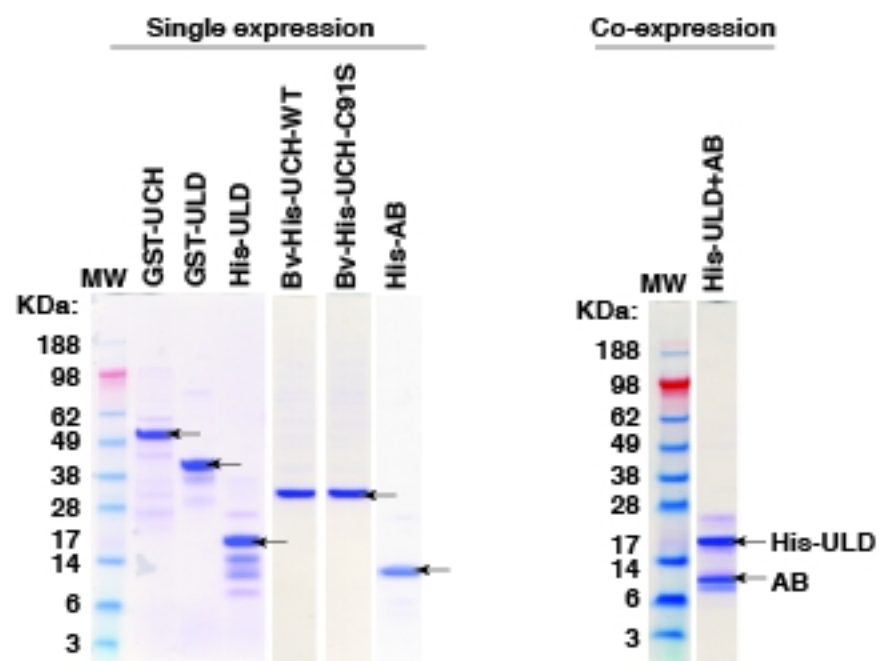

Figure 2

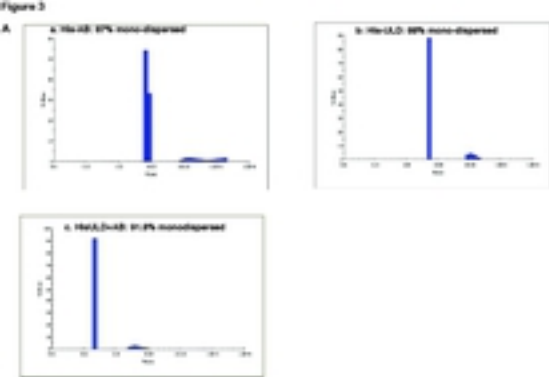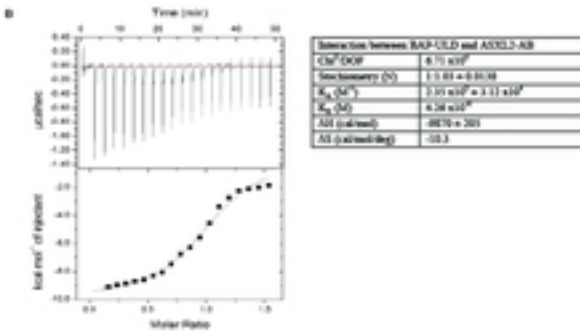

Figure 3, AB

Figure 3

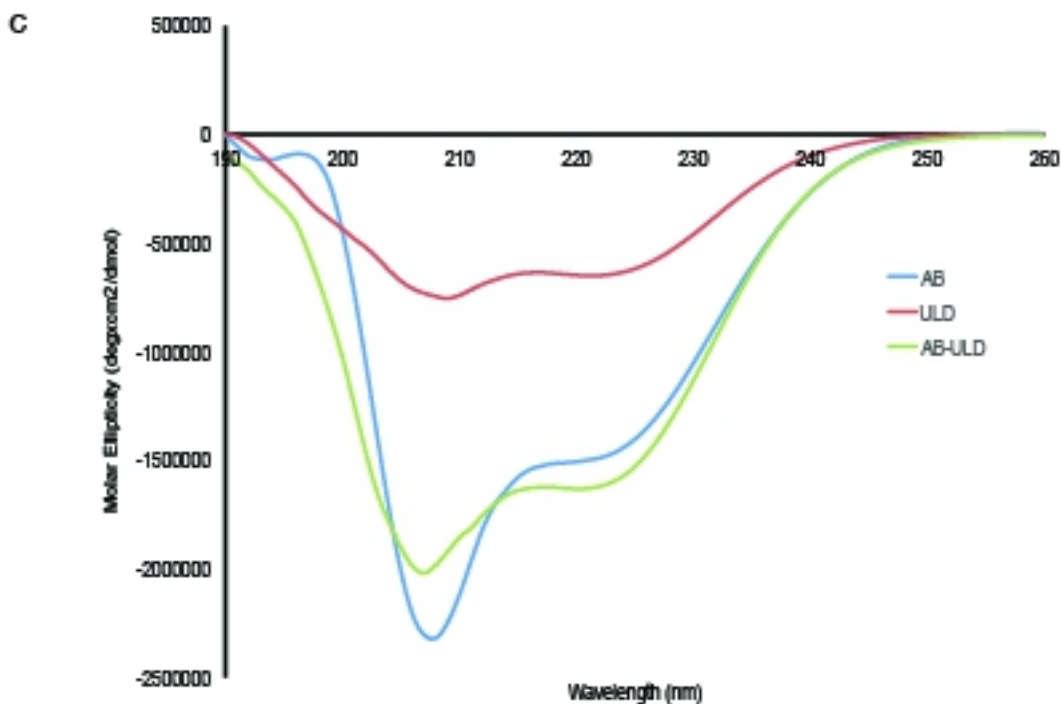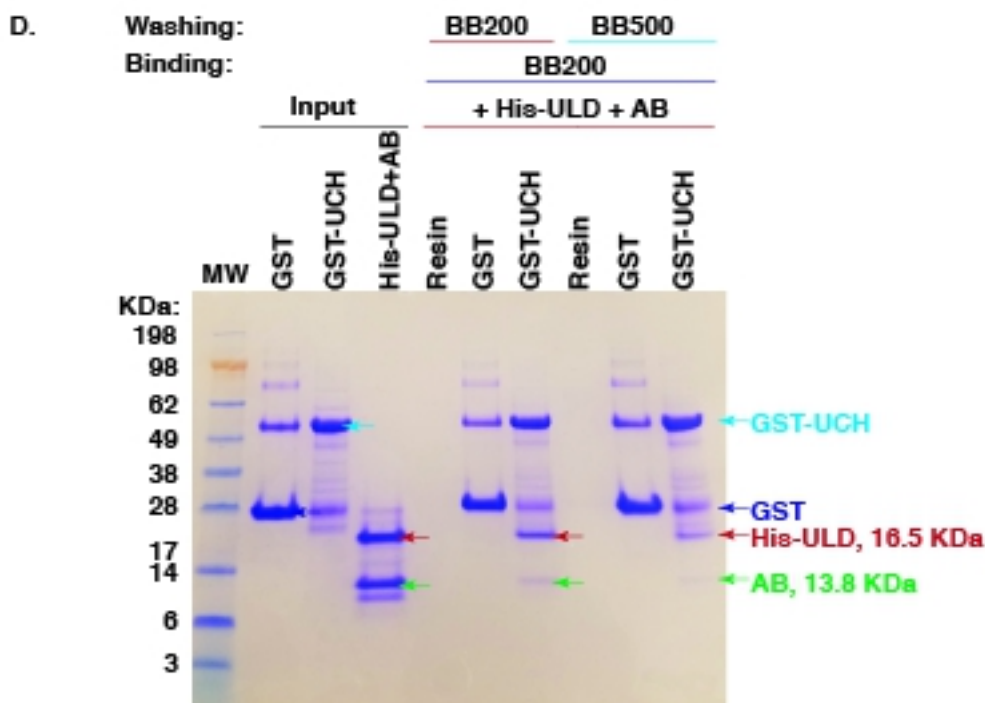

Figure 3, CD

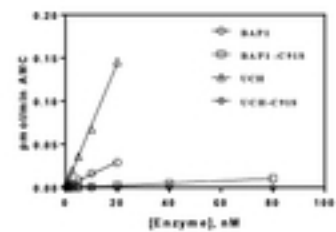

| Protein   | Specific Activity (μmol AMC/min/μmol E) |
|-----------|-----------------------------------------|
| BAP1      | 73 ± 2.4                                |
| BAP1-CS1S | 6.7 ± 0.12                              |
| UCH       | 358 ± 8.6                               |
| UCH-CS1S  | < 1                                     |

Figure 4

Figure 5

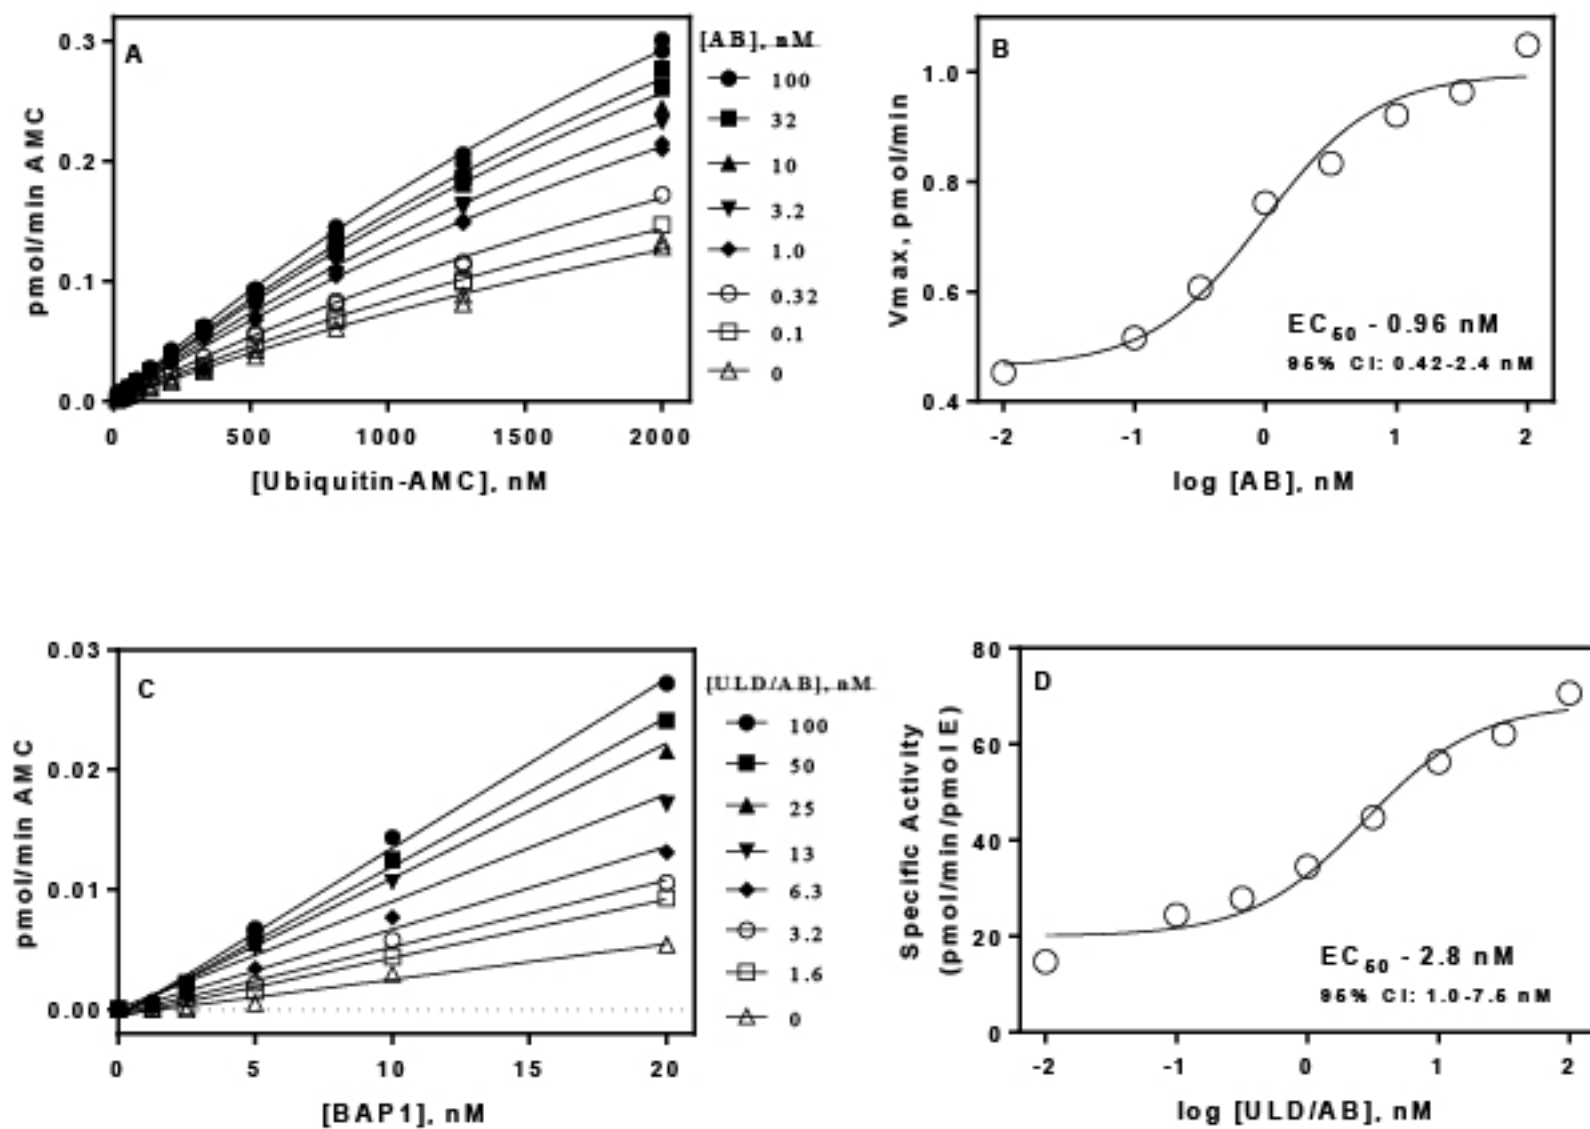

Figure 5



Figure 6

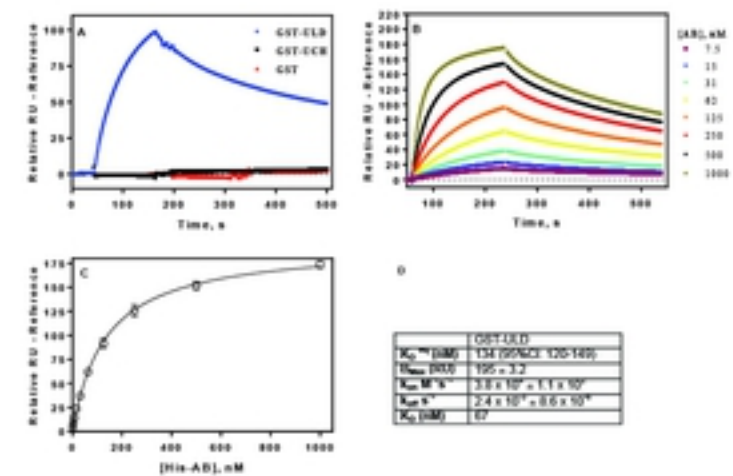

Figure 6

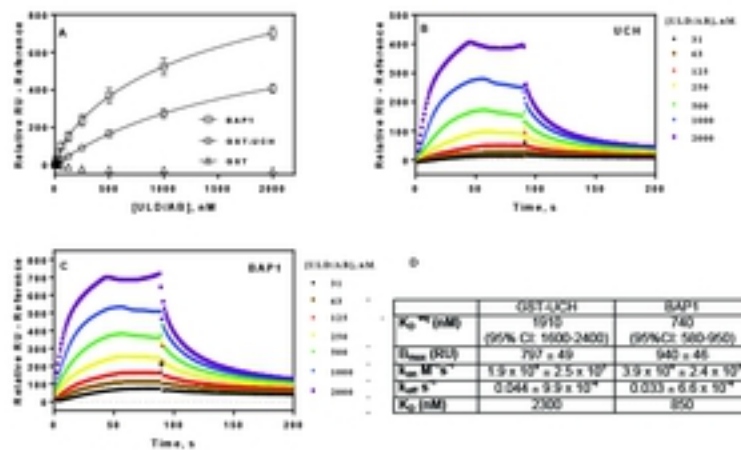

Figure 7
